# Supplementary material for: Substantially improved energy density of SrTiO3 thin film by cyclic cooling–heating and the interfacial blocking effect
Source: Royal Society of Chemistry journal article supplement (doi:10.1039/c8tc01748d), 2018-01-01
Supplement: c8tc01748d1.pdf [file c8tc01748d1.pdf]

## Supplementary information

### Substantially improved energy density of SrTiO<sub>3</sub> thin film by cyclic cooling-heating and interfacial blocking effect

Wenbin Gao,<sup>a</sup> Manwen Yao,<sup>\*b</sup> and Xi Yao<sup>a</sup>

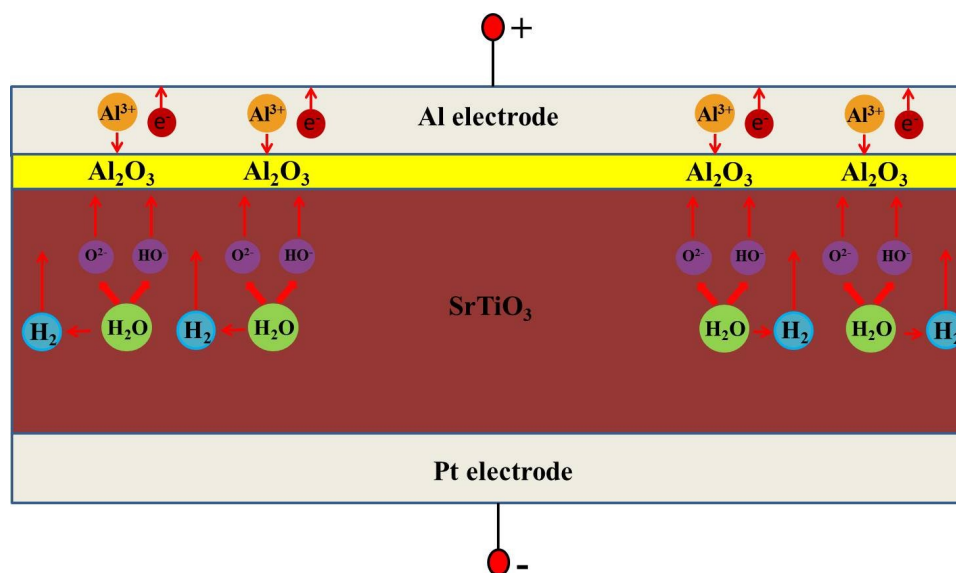

**Fig. S1.** The anodic oxidation reaction model of the SrTiO<sub>3</sub> film with Al electrode.

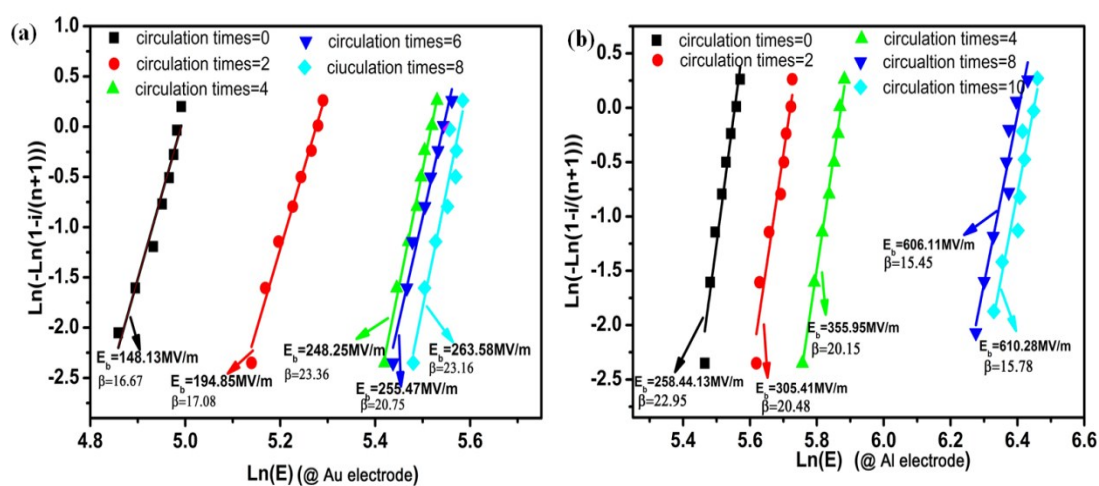

**Fig. S2.** Weibull plots for Au and Al electrode.

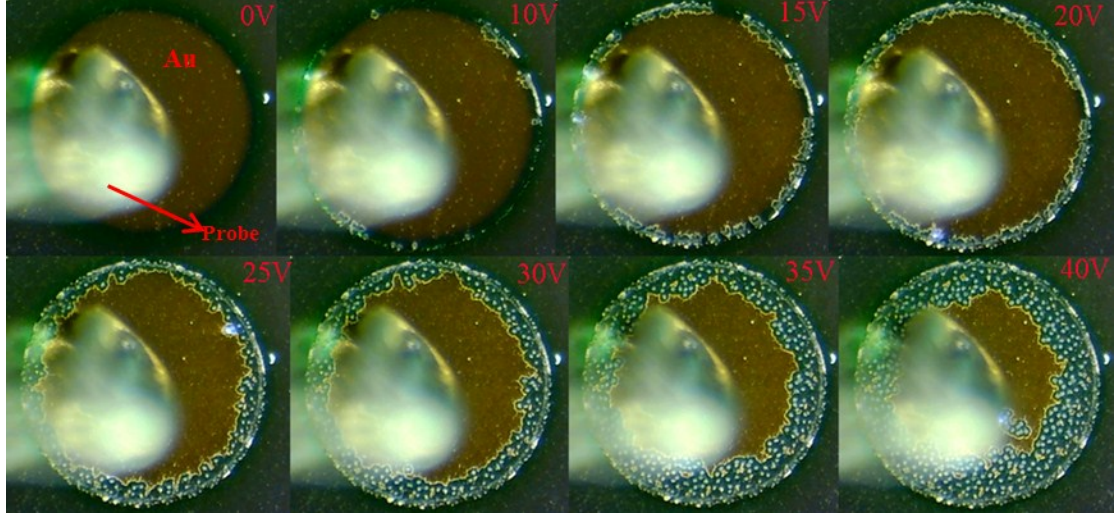

**Fig. S3** Observation of breakdown process for Au electrode with an optical microscopy system.

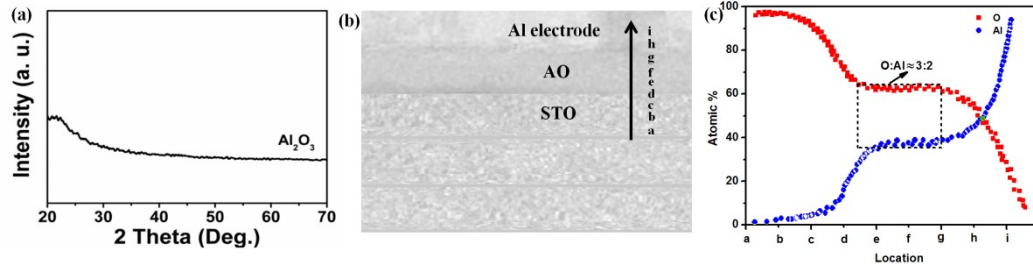

**Fig. S4** (a) XRD pattern of generated  $\text{Al}_2\text{O}_3$  layer. (b)–(c) Selected path of EDS for linear scanning

**S5.** According to the TSDC theory , dipole polarization can be described with a single relaxation with the classical Debye model and thermally stimulated depolarization process was shown in equation (S1). The corresponding parameters of T is the absolute temperature, p is polarization intensity,  $\beta$  is the heating rate, k is Boltzmann constant,  $\tau_0$  is the relaxation time at infinite temperature and H is the activation energy.

$$I(TSDC) = -\beta \frac{dp(T)}{dT} = \frac{p_0(T_0)}{\tau_0} \times \exp \left( -\frac{H}{kT} - \frac{1}{\beta \tau_0} \int_{T_0}^T e^{\frac{H}{kT}} dT \right) \quad (\text{S1})$$

The characteristics of dipole polarization can be figured out clearly in equation (S3) and (S4) which originated from derivation process in equation (S2). Equation (S3)

displays that peak temperature ( $T_m$ ) is independent of poling field ( $E$ ) while equation (S4) exhibits a linear relation of peak current ( $I_m$ ) with the poling field ( $E$ ). For the terms in the pre-exponential factor in equation (S4),  $N$  is the dipole density,  $\mu$  is dipole moment,  $E$  is poling field, and  $T_b$  is poling temperature.

$$\frac{dI(TSDC)}{dT} = \frac{P_0}{\tau_0} \exp\left(-\frac{H}{kT} - \frac{1}{\beta\tau_0} \int_{T_0}^T e^{-\frac{H}{kT}} dT\right) \times \left(\frac{1}{kT^2} - \frac{1}{\beta\tau_0} e^{-\frac{H}{kT}}\right) = 0 \quad (S2)$$

$$\frac{H_0}{kT_m^2} = \frac{1}{\beta\tau_0} e^{-\frac{H_0}{kT_m^2}} \quad (S3)$$

$$I_m = \frac{N\mu^2 E}{3kT_b\tau_0} \times \exp\left(-\frac{H_0}{kT_m} - \frac{1}{\beta\tau_0} \int_{T_0}^T e^{-\frac{H_m}{kT_m}} dT\right) \quad (S4)$$

The total charge of ionic polarization should accord with the form of sinh function, as shown in equation (S5), where  $q$  is the ionic charge,  $N$  is the density of the moving ions and  $a$  is the separation.

$$Q_{TSC} = p(t_b) = \frac{1}{\beta} \int I(T) dT = Q_0 \sinh\left(\frac{qaE_b}{2kT_b}\right) \quad (S5)$$
